# Supplementary material
Source: MDPI journal article supplement (https://www.mdpi.com/1424-8247/15/2/153)
Supplement: s1 [file s1]

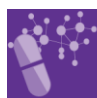

# Exploring Toxins for hunting SARS-CoV-2 Main Protease Inhibitors: Molecular docking, molecular dynamics, pharmacokinetic properties, and Reactome study

Mahmoud A. A. Ibrahim <sup>1,\*</sup>, Alaa H. M. Abdelrahman <sup>1</sup>, Laila A. Jaragh-Alhadad <sup>2,3,\*</sup>, Mohamed A. M. Atia <sup>4</sup>, Othman R. Alzahrani <sup>5</sup>, Muhammad Naeem Ahmed <sup>6</sup>, Moustafa Sherief Moustafa <sup>2</sup>, Mahmoud E. S. Soliman <sup>7</sup>, Ahmed M. Shawky <sup>8</sup>, Paul W. Paré <sup>9</sup>, Mohamed-Elamir F. Hegazy <sup>10</sup> and Peter A. Sidhom <sup>11</sup>

<sup>1</sup> Computational Chemistry Laboratory, Chemistry Department, Faculty of Science, Minia University, Minia 61519, Egypt; a.abdelrahman@compchem.net

<sup>2</sup> Department of Chemistry, Faculty of Science, Kuwait University, Safat 13060, Kuwait; mostafa\_msm@hotmail.com

<sup>3</sup> Cardiovascular and Metabolic Sciences Department, Lerner Research Institute, Cleveland Clinic, Cleveland, OH 44195, USA

<sup>4</sup> Molecular Genetics and Genome Mapping Laboratory, Genome Mapping Department, Agricultural Genetic Engineering Research Institute (AGERI), Agricultural Research Center (ARC), Giza 12619, Egypt; matia@ageri.sci.eg

<sup>5</sup> Department of Biology, Faculty of Science, University of Tabuk, Tabuk 71491, Saudi Arabia; o-alzahrani@ut.edu.sa

<sup>6</sup> Department of Chemistry, The University of Azad Jammu and Kashmir, Muzaffarabad 13100, Pakistan; drnaeem@ajku.edu.pk

<sup>7</sup> Molecular Modelling and Drug Design Research Group, School of Health Sciences, University of KwaZulu-Natal, Westville, Durban 4000, South Africa; soliman@ukzn.ac.za

<sup>8</sup> Science and Technology Unit (STU), Umm Al-Qura University, Makkah 21955, Saudi Arabia; ames-mail@uqu.edu.sa

<sup>9</sup> Department of Chemistry & Biochemistry, Texas Tech University, Lubbock, TX 79409, USA; paul.pare@ttu.edu

<sup>10</sup> Chemistry of Medicinal Plants Department, National Research Centre, 33 El-Bohouth St., Dokki, Giza 12622, Egypt; elamir77@live.com

<sup>11</sup> Department of Pharmaceutical Chemistry, Faculty of Pharmacy, Tanta University, Tanta 31527, Egypt; peter.ayoub@pharm.tanta.edu.eg

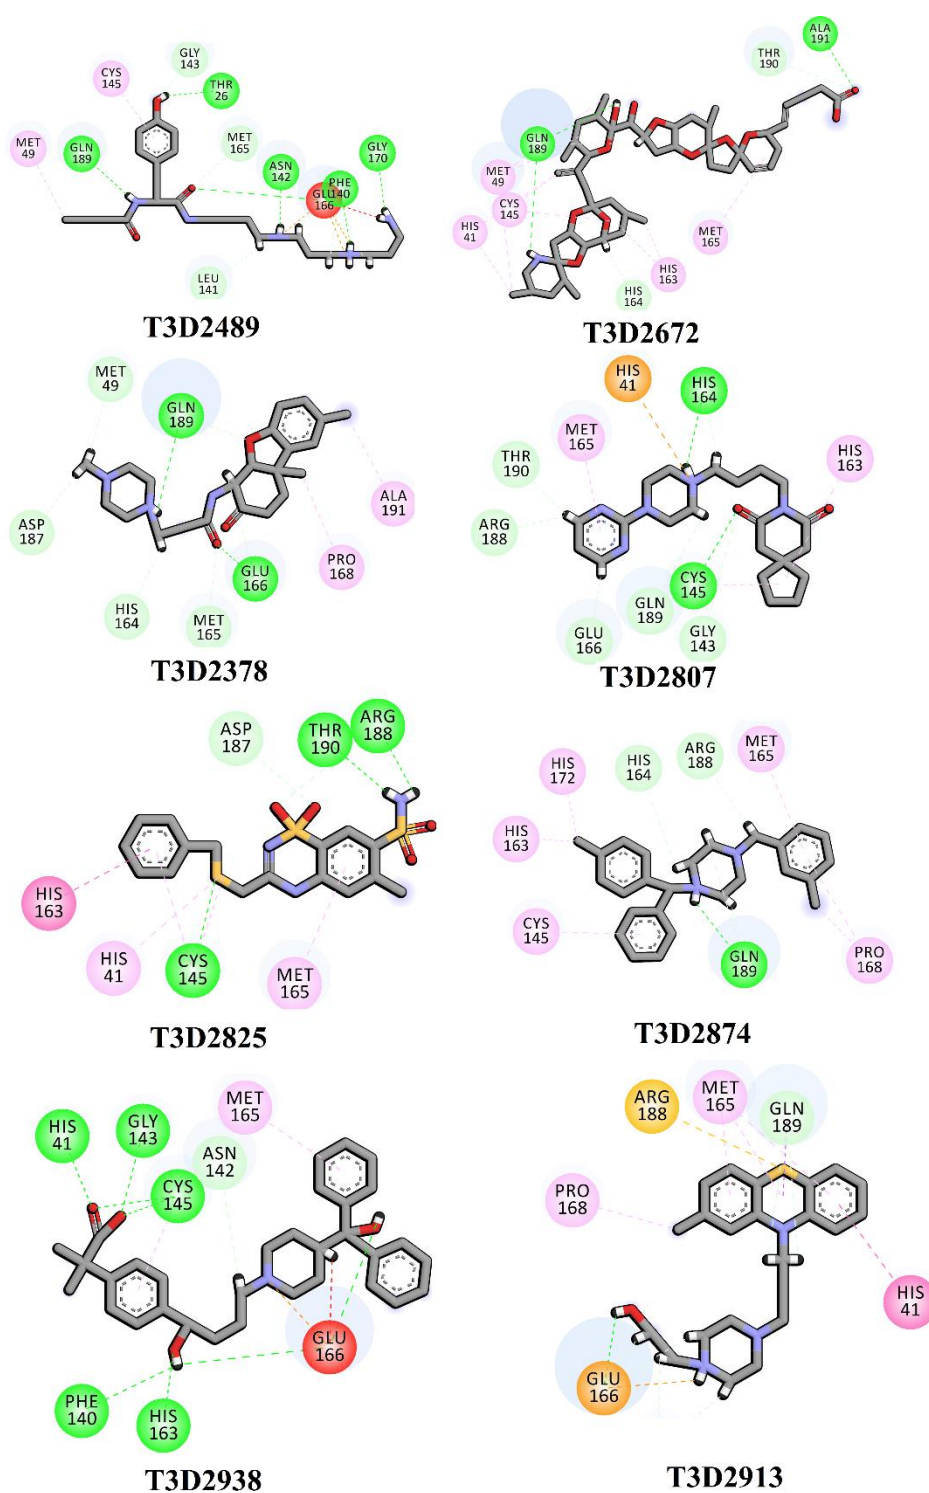

**Figure S1.** 2D representations of the binding modes of the thirty-two potent toxins complexed with SARS-CoV-2 main protease ( $M^{pro}$ ).

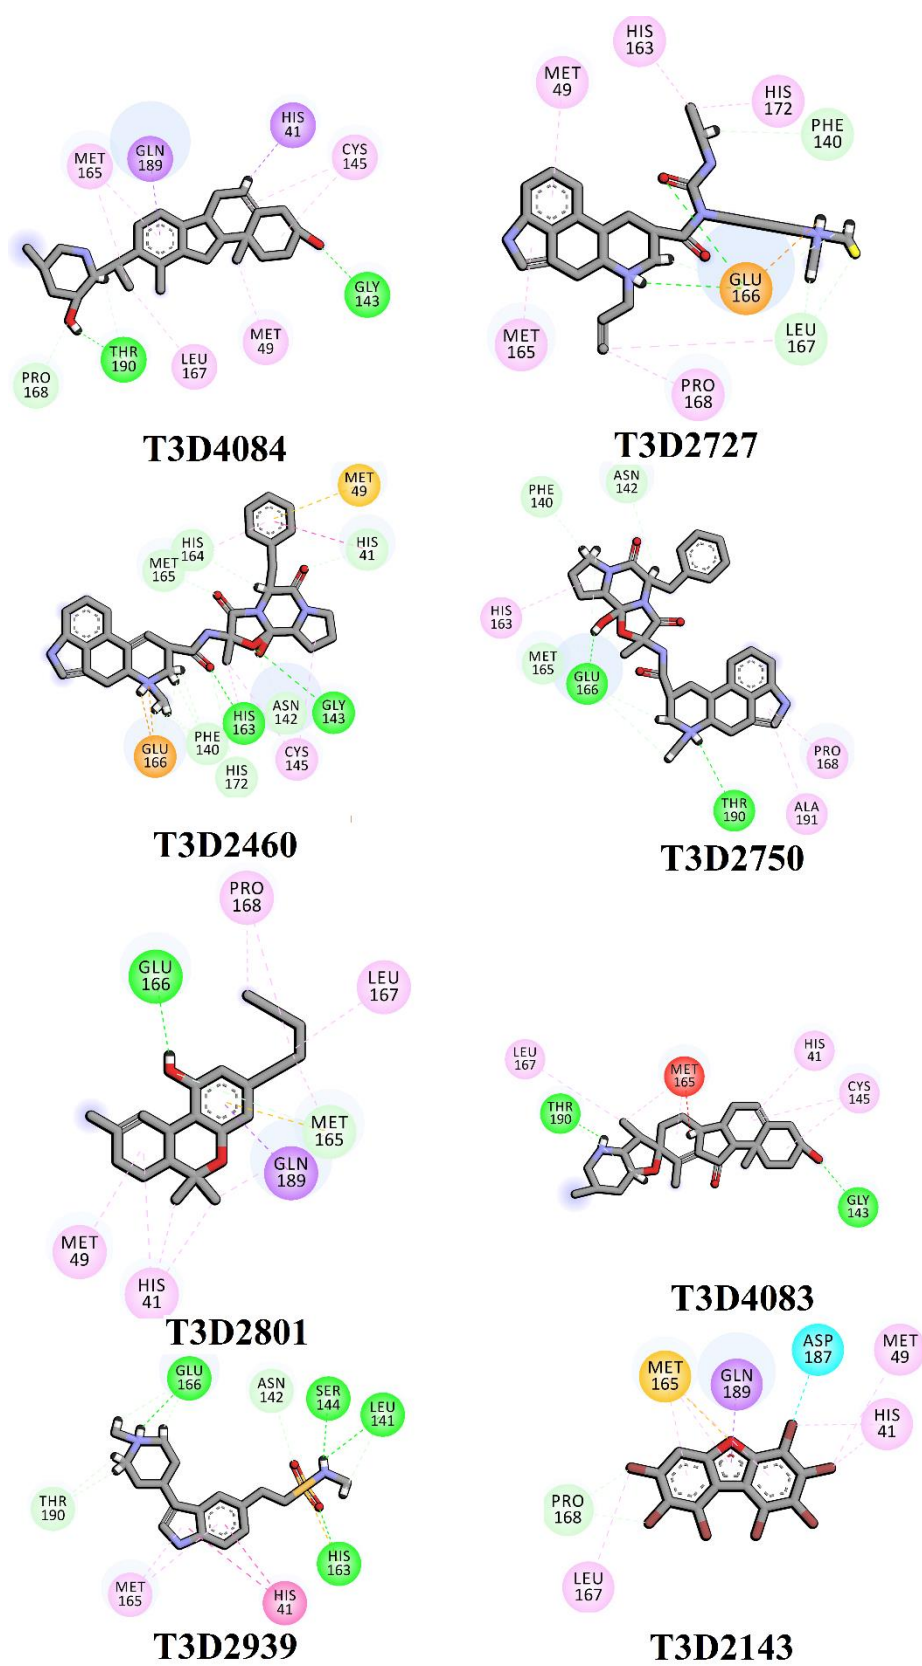

Figure S1. Continued.

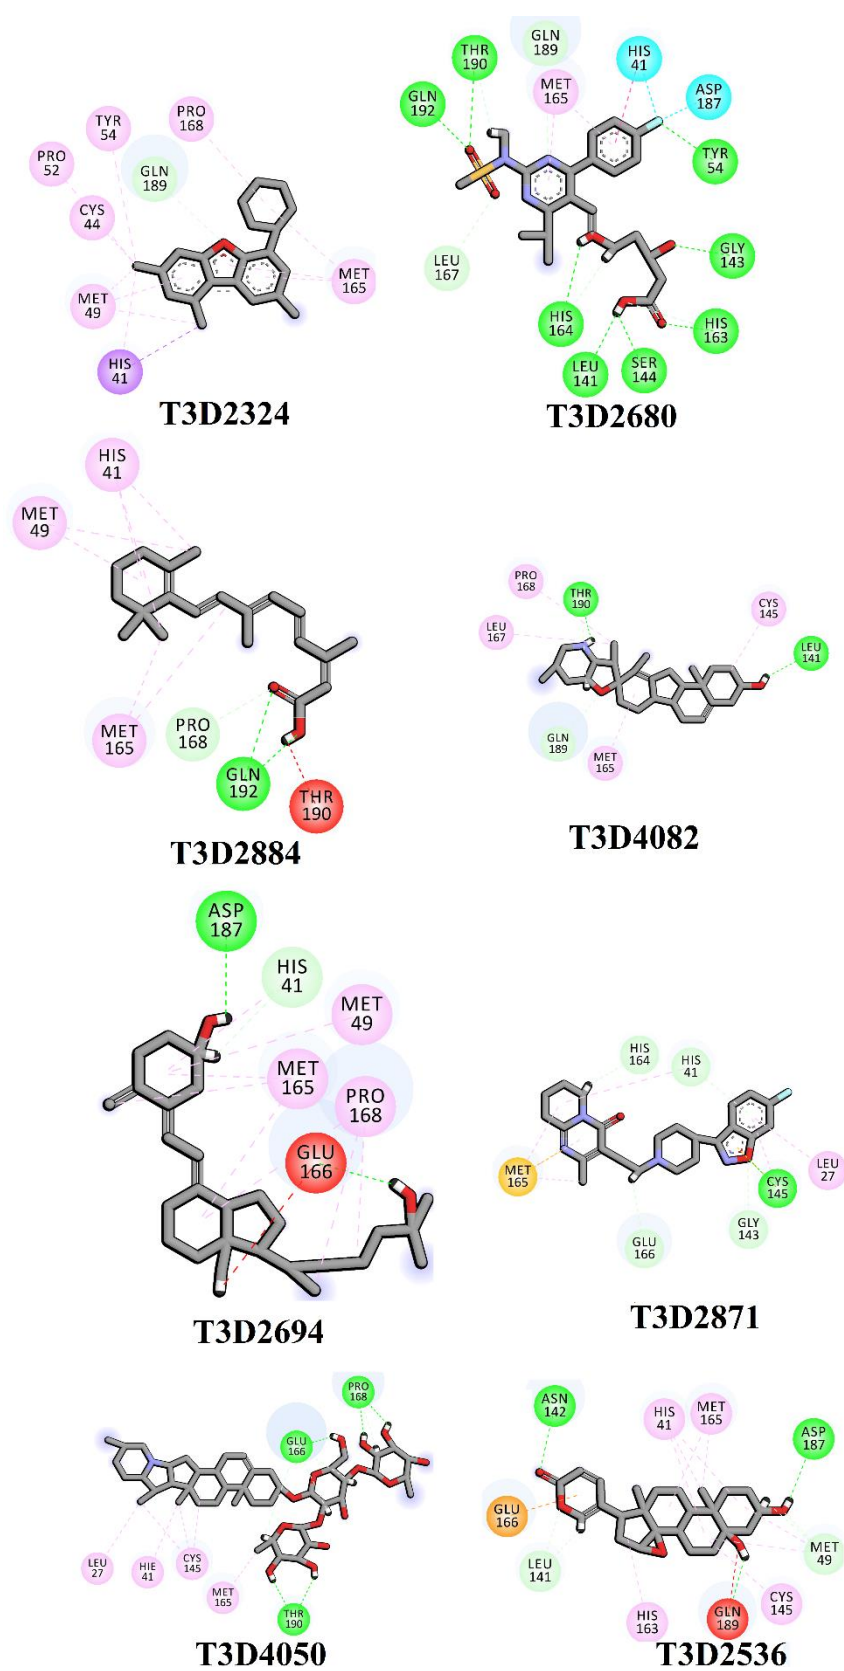

Figure S1. Continued.



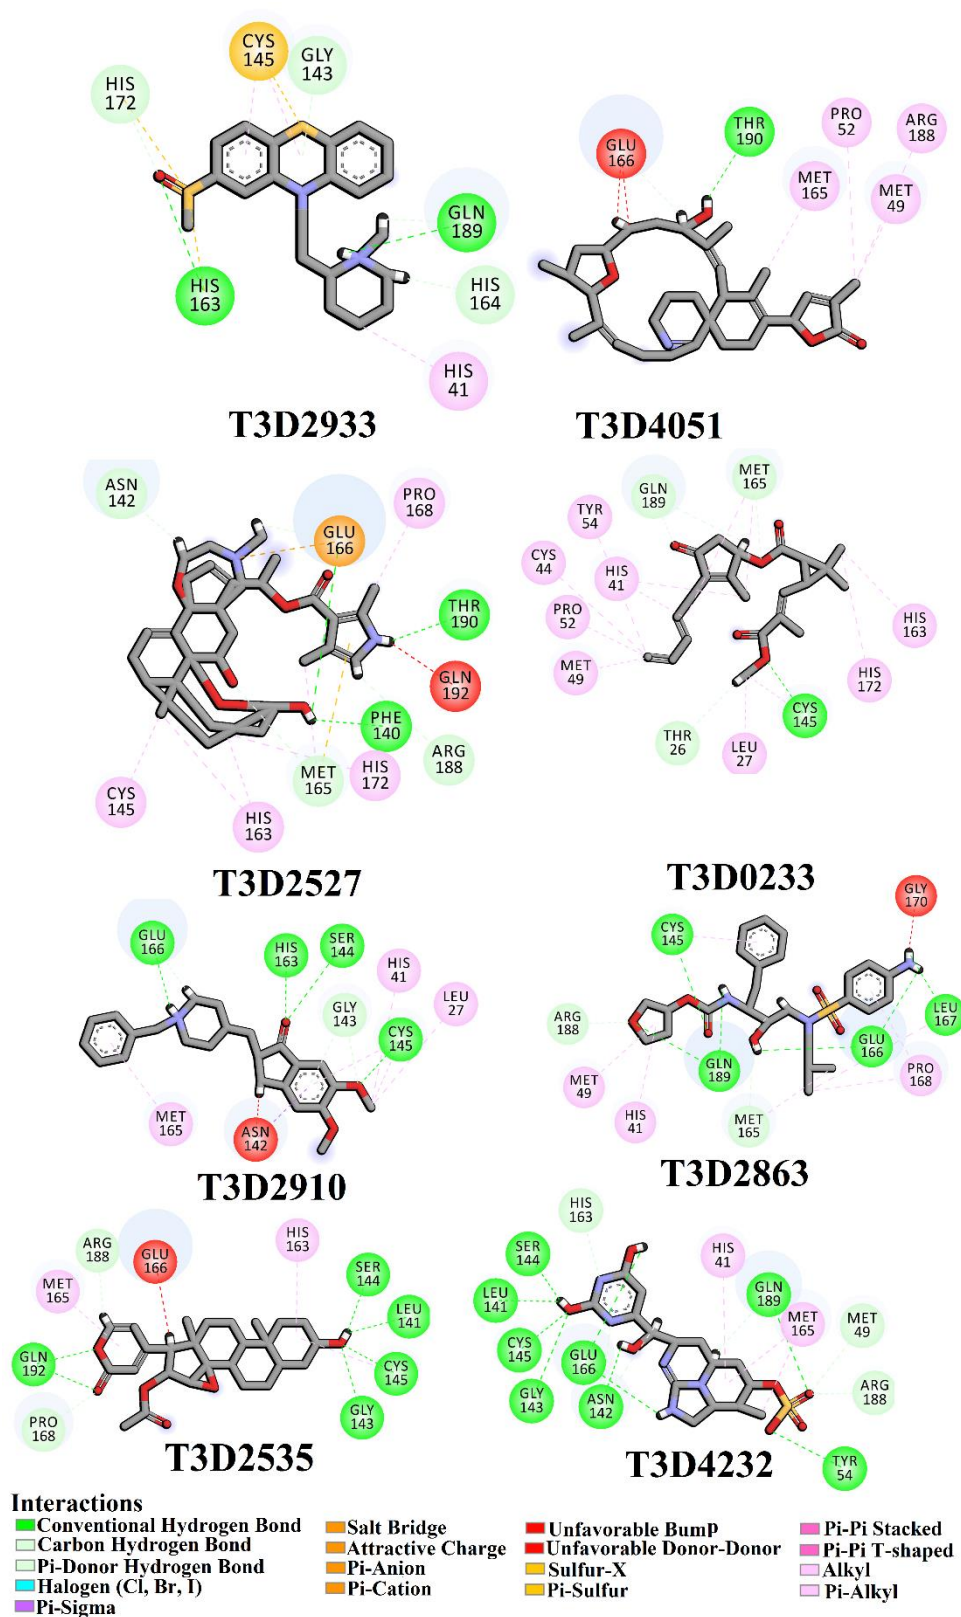

Figure S1. Continued.

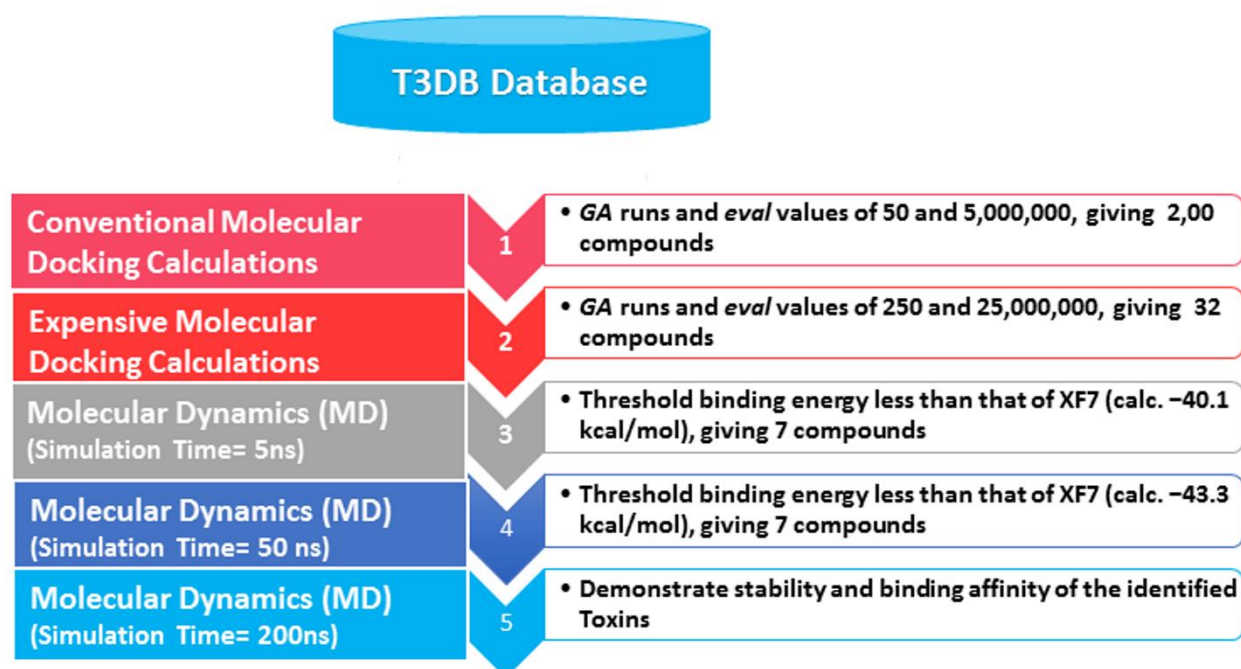

**Figure S2.** Schematic representation of the utilized *in silico* techniques and the filtration process.

**Table S1.** Estimated conventional and expansive docking scores (in kcal/mol), for top 200 toxins towards SARS-CoV-2 main protease (M<sup>pro</sup>).<sup>a</sup>

| No. | Compound Name/Code | Docking Score (kcal/mol) |                   | No. | Compound Name/Code | Docking Score (kcal/mol) |                   | No. | Compound Name/Code | Docking Score (kcal/mol) |                   |
|-----|--------------------|--------------------------|-------------------|-----|--------------------|--------------------------|-------------------|-----|--------------------|--------------------------|-------------------|
|     |                    | Conv. <sup>b</sup>       | Exp. <sup>c</sup> |     |                    | Conv. <sup>b</sup>       | Exp. <sup>c</sup> |     |                    | Conv. <sup>b</sup>       | Exp. <sup>c</sup> |
|     | XF7                | −9.1                     | −9.5              |     |                    |                          |                   |     |                    |                          |                   |
| 1   | T3D2489            | −11.7                    | −11.7             | 54  | T3D0015            | −9.1                     | −9.1              | 107 | T3D2528            | −8.5                     | −8.6              |
| 2   | T3D2672            | −11.3                    | −11.6             | 55  | T3D3925            | −9.1                     | −9.1              | 108 | T3D2755            | −8.5                     | −8.5              |
| 3   | T3D2378            | −11.2                    | −11.2             | 56  | T3D3887            | −9.1                     | −9.1              | 109 | T3D4088            | −8.3                     | −8.5              |
| 4   | T3D2807            | −10.9                    | −10.9             | 57  | T3D4512            | −8.6                     | −9.1              | 110 | T3D2985            | −8.5                     | −8.5              |
| 5   | T3D2825            | −10.9                    | −10.9             | 58  | T3D3726            | −9.0                     | −9.0              | 111 | T3D2753            | −8.5                     | −8.5              |
| 6   | T3D2874            | −10.8                    | −10.9             | 59  | T3D2162            | −9.0                     | −9.0              | 112 | T3D2796            | −8.5                     | −8.5              |
| 7   | T3D2938            | −10.5                    | −10.8             | 60  | T3D2483            | −8.6                     | −9.0              | 113 | T3D0636            | −8.5                     | −8.5              |
| 8   | T3D2913            | −10.5                    | −10.8             | 61  | T3D3742            | −9.0                     | −9.0              | 114 | T3D2044            | −8.5                     | −8.5              |
| 9   | T3D4084            | −10.2                    | −10.6             | 62  | T3D3752            | −9.0                     | −9.0              | 115 | T3D3907            | −8.5                     | −8.5              |
| 10  | T3D2727            | −10.1                    | −10.5             | 63  | T3D4957            | −8.4                     | −9.0              | 116 | T3D2951            | −8.7                     | −8.5              |
| 11  | T3D2460            | −10.1                    | −10.2             | 64  | T3D3722            | −9.0                     | −9.0              | 117 | T3D2015            | −8.5                     | −8.5              |
| 12  | T3D2750            | −10.0                    | −10.2             | 65  | T3D2532            | −9.0                     | −9.0              | 118 | T3D3746            | −8.5                     | −8.5              |
| 13  | T3D2801            | −10.0                    | −10.1             | 66  | T3D0629            | −8.9                     | −8.9              | 119 | T3D2004            | −8.4                     | −8.4              |
| 14  | T3D4083            | −9.9                     | −10.1             | 67  | T3D2757            | −8.5                     | −8.9              | 120 | T3D4235            | −8.5                     | −8.4              |
| 15  | T3D2939            | −9.8                     | −10.0             | 68  | T3D0174            | −8.9                     | −8.9              | 121 | T3D2836            | −8.1                     | −8.4              |
| 16  | T3D2143            | −9.8                     | −10.0             | 69  | T3D2978            | −8.5                     | −8.9              | 122 | T3D3782            | −8.4                     | −8.4              |
| 17  | T3D2324            | −9.2                     | −9.9              | 70  | T3D2892            | −8.5                     | −8.9              | 123 | T3D2677            | −8.3                     | −8.4              |
| 18  | T3D2680            | −9.8                     | −9.9              | 71  | T3D2043            | −8.9                     | −8.9              | 124 | T3D0010            | −8.4                     | −8.4              |
| 19  | T3D2884            | −9.8                     | −9.9              | 72  | T3D3721            | −8.9                     | −8.9              | 125 | T3D0062            | −8.4                     | −8.4              |
| 20  | T3D4082            | −9.8                     | −9.8              | 73  | T3D2995            | −8.2                     | −8.8              | 126 | T3D2002            | −8.4                     | −8.4              |
| 21  | T3D2694            | −9.7                     | −9.8              | 74  | T3D2358            | −8.8                     | −8.8              | 127 | T3D2837            | −8.4                     | −8.4              |
| 22  | T3D2871            | −9.7                     | −9.8              | 75  | T3D2697            | −8.8                     | −8.8              | 128 | T3D1672            | −8.4                     | −8.4              |
| 23  | T3D4050            | −9.6                     | −9.8              | 76  | T3D4032            | −8.8                     | −8.8              | 129 | T3D2988            | −8.4                     | −8.4              |
| 24  | T3D2536            | −9.6                     | −9.8              | 77  | T3D4343            | −9.2                     | −8.8              | 130 | T3D3781            | −8.6                     | −8.4              |
| 25  | T3D2933            | −9.6                     | −9.7              | 78  | T3D4910            | −8.7                     | −8.8              | 131 | T3D4056            | −8.4                     | −8.4              |
| 26  | T3D4051            | −9.5                     | −9.7              | 79  | T3D3762            | −8.8                     | −8.8              | 132 | T3D3834            | −8.4                     | −8.4              |
| 27  | T3D2527            | −9.5                     | −9.7              | 80  | T3D4314            | −8.7                     | −8.8              | 133 | T3D2134            | −8.3                     | −8.3              |
| 28  | T3D0233            | −9.5                     | −9.7              | 81  | T3D2700            | −8.2                     | −8.8              | 134 | T3D2328            | −8.3                     | −8.3              |
| 29  | T3D2910            | −9.5                     | −9.6              | 82  | T3D2017            | −8.8                     | −8.8              | 135 | T3D3914            | −8.3                     | −8.3              |
| 30  | T3D2863            | −9.5                     | −9.6              | 83  | T3D3891            | −8.7                     | −8.8              | 136 | T3D2773            | −8.3                     | −8.3              |
| 31  | T3D2535            | −9.4                     | −9.6              | 84  | T3D3712            | −8.7                     | −8.7              | 137 | T3D2338            | −8.3                     | −8.3              |
| 32  | T3D4232            | −9.3                     | −9.6              | 85  | T3D3729            | −8.8                     | −8.7              | 138 | T3D3915            | −8.2                     | −8.3              |
| 33  | T3D4068            | −9.2                     | −9.5              | 86  | T3D2975            | −8.7                     | −8.7              | 139 | T3D2001            | −8.1                     | −8.3              |
| 34  | T3D3767            | −9.2                     | −9.5              | 87  | T3D2984            | −8.6                     | −8.7              | 140 | T3D2911            | −8.4                     | −8.3              |
| 35  | T3D4988            | −8.2                     | −9.5              | 88  | T3D2045            | −8.7                     | −8.7              | 141 | T3D2012            | −8.4                     | −8.3              |
| 36  | T3D4923            | −9.2                     | −9.5              | 89  | T3D3847            | −8.7                     | −8.7              | 142 | T3D2751            | −8.3                     | −8.3              |
| 37  | T3D3778            | −9.2                     | −9.5              | 90  | T3D2041            | −8.7                     | −8.7              | 143 | T3D4283            | −8.3                     | −8.3              |
| 38  | T3D4916            | −9.2                     | −9.5              | 91  | T3D3880            | −8.7                     | −8.7              | 144 | T3D2137            | −8.3                     | −8.3              |
| 39  | T3D0631            | −9.2                     | −9.5              | 92  | T3D2968            | −8.6                     | −8.7              | 145 | T3D2040            | −8.3                     | −8.3              |
| 40  | T3D3733            | −9.2                     | −9.5              | 93  | T3D2920            | −8.6                     | −8.7              | 146 | T3D0548            | −8.3                     | −8.3              |
| 41  | T3D4242            | −9.2                     | −9.5              | 94  | T3D4937            | −8.0                     | −8.7              | 147 | T3D2188            | −8.3                     | −8.3              |
| 42  | T3D3732            | −9.2                     | −9.5              | 95  | T3D2703            | −8.6                     | −8.7              | 148 | T3D0632            | −8.3                     | −8.3              |
| 43  | T3D3763            | −9.2                     | −9.5              | 96  | T3D2008            | −8.7                     | −8.7              | 149 | T3D1673            | −8.2                     | −8.3              |
| 44  | T3D4963            | −8.8                     | −9.5              | 97  | T3D3710            | −8.7                     | −8.7              | 150 | T3D3768            | −8.3                     | −8.3              |
| 45  | T3D3777            | −9.2                     | −9.5              | 98  | T3D2858            | −8.6                     | −8.7              | 151 | T3D2026            | −8.3                     | −8.3              |
| 46  | T3D4914            | −9.2                     | −9.5              | 99  | T3D4961            | −8.5                     | −8.6              | 152 | T3D2722            | −8.2                     | −8.3              |
| 47  | T3D2907            | −8.7                     | −9.5              | 100 | T3D2692            | −8.4                     | −8.6              | 153 | T3D2003            | −8.3                     | −8.3              |
| 48  | T3D3779            | −9.2                     | −9.5              | 101 | T3D3875            | −9.2                     | −8.6              | 154 | T3D2897            | −8.1                     | −8.3              |
| 49  | T3D3709            | −9.2                     | −9.5              | 102 | T3D2852            | −8.5                     | −8.6              | 155 | T3D4087            | −8.3                     | −8.3              |
| 50  | T3D3748            | −9.2                     | −9.5              | 103 | T3D1147            | −8.6                     | −8.6              | 156 | T3D2145            | −8.3                     | −8.3              |
| 51  | T3D4322            | −8.5                     | −9.5              | 104 | T3D1649            | −8.1                     | −8.6              | 157 | T3D2699            | −8.2                     | −8.3              |
| 52  | T3D2961            | −9.2                     | −9.4              | 105 | T3D2997            | −8.3                     | −8.6              | 158 | T3D2789            | −8.3                     | −8.3              |
| 53  | T3D3734            | −9.2                     | −9.3              | 106 | T3D4240            | −8.5                     | −8.6              | 159 | T3D3744            | −8.2                     | −8.2              |

**Table S1.** Continued.

| No. | Compound Name/Code | Docking Score (kcal/mol) |                   | No. | Compound Name/Code | Docking Score (kcal/mol) |                   | No. | Compound Name/Code | Docking Score (kcal/mol) |                   |
|-----|--------------------|--------------------------|-------------------|-----|--------------------|--------------------------|-------------------|-----|--------------------|--------------------------|-------------------|
|     |                    | Conv. <sup>b</sup>       | Exp. <sup>c</sup> |     |                    | Conv. <sup>b</sup>       | Exp. <sup>c</sup> |     |                    | Conv. <sup>b</sup>       | Exp. <sup>c</sup> |
| 160 | T3D4021            | −8.2                     | −8.2              | 173 | T3D2007            | −8.2                     | −8.2              | 187 | T3D0516            | −8.1                     | −8.1              |
| 161 | T3D3747            | −8.6                     | −8.2              | 174 | T3D3720            | −8.2                     | −8.2              | 188 | T3D2154            | −8.1                     | −8.1              |
| 162 | T3D4245            | −8.2                     | −8.2              | 175 | T3D3838            | −8.2                     | −8.2              | 189 | T3D0578            | −8.1                     | −8.0              |
| 162 | T3D4504            | −8.2                     | −8.2              | 176 | T3D2158            | −8.1                     | −8.1              | 190 | T3D2147            | −8.0                     | −8.0              |
| 163 | T3D2742            | −8.2                     | −8.2              | 177 | T3D3800            | −8.1                     | −8.1              | 191 | T3D3780            | −8.1                     | −8.0              |
| 164 | T3D2888            | −8.2                     | −8.2              | 178 | T3D3745            | −8.1                     | −8.1              | 192 | T3D4086            | −8.0                     | −8.0              |
| 165 | T3D2917            | −8.2                     | −8.2              | 179 | T3D4103            | −8.1                     | −8.1              | 193 | T3D2139            | −8.0                     | −8.0              |
| 166 | T3D3759            | −8.1                     | −8.2              | 180 | T3D2929            | −8.0                     | −8.1              | 194 | T3D2673            | −8.0                     | −8.0              |
| 167 | T3D2886            | −8.1                     | −8.2              | 181 | T3D2469            | −8.0                     | −8.1              | 195 | T3D2966            | −8.3                     | −8.0              |
| 168 | T3D2115            | −8.2                     | −8.2              | 182 | T3D1221            | −8.1                     | −8.1              | 196 | T3D2011            | −8.1                     | −8.0              |
| 169 | T3D4092            | −8.2                     | −8.2              | 183 | T3D2842            | −8.1                     | −8.1              | 197 | T3D4942            | −8.1                     | −8.0              |
| 170 | T3D4983            | −8.2                     | −8.2              | 184 | T3D4064            | −8.1                     | −8.1              | 198 | T3D4029            | −9.2                     | −8.0              |
| 171 | T3D0622            | −8.2                     | −8.2              | 185 | T3D2101            | −8.1                     | −8.1              | 199 | T3D2670            | −8.4                     | −8.0              |
| 172 | T3D2010            | −8.2                     | −8.2              | 186 | T3D0495            | −8.1                     | −8.1              | 200 | T3D4030            | −8.4                     | −8.0              |

<sup>a</sup>Data sorted according to the expensive docking scores.

<sup>b</sup>Conv. stands for the conventional docking calculation.

<sup>c</sup>exp. stands for the expensive docking calculation.

**Table S2.** Estimated conventional and expansive docking scores (in kcal/mol), and MM-GBSA binding energies (in kcal/mol) over 5 ns MD simulations for XF7 and the top 32 potent toxins towards SARS-CoV-2 main protease (M<sup>pro</sup>).<sup>a</sup>

| No. | Compound Name/Code | Docking Score (kcal/mol) |                   | MM-GBSA Binding Energy (kcal/mol) |
|-----|--------------------|--------------------------|-------------------|-----------------------------------|
|     |                    | Conv. <sup>b</sup>       | Exp. <sup>c</sup> |                                   |
|     | XF7                | −9.1                     | −9.5              | −40.1                             |
| 1   | T3D2489            | −11.7                    | −11.7             | −54.7                             |
| 2   | T3D2672            | −11.3                    | −11.6             | −53.1                             |
| 3   | T3D2807            | −10.9                    | −10.9             | −48.2                             |
| 4   | T3D2378            | −11.2                    | −11.2             | −48.1                             |
| 5   | T3D2825            | −10.9                    | −10.9             | −42.8                             |
| 6   | T3D2938            | −10.5                    | −10.8             | −42.8                             |
| 7   | T3D2460            | −10.1                    | −10.2             | −42.0                             |
| 8   | T3D2874            | −10.8                    | −10.9             | −40.0                             |
| 9   | T3D2727            | −10.1                    | −10.5             | −39.9                             |
| 10  | T3D2750            | −10.0                    | −10.2             | −39.9                             |
| 11  | T3D2913            | −10.5                    | −10.8             | −39.9                             |
| 12  | T3D4084            | −10.2                    | −10.6             | −39.9                             |



|    |         |       |       |       |
|----|---------|-------|-------|-------|
| 13 | T3D4083 | −9.9  | −10.1 | −36.4 |
| 14 | T3D2801 | −10.0 | −10.1 | −35.9 |
| 15 | T3D2939 | −9.8  | −10.0 | −33.7 |
| 16 | T3D2143 | −9.8  | −10.0 | −32.8 |
| 17 | T3D2324 | −9.2  | −9.9  | −32.5 |
| 18 | T3D2680 | −9.8  | −9.9  | −32.1 |
| 19 | T3D2884 | −9.8  | −9.9  | −31.6 |
| 20 | T3D4082 | −9.8  | −9.8  | −31.5 |
| 21 | T3D2694 | −9.7  | −9.8  | −31.1 |
| 22 | T3D2871 | −9.7  | −9.8  | −30.7 |
| 23 | T3D4050 | −9.6  | −9.8  | −30.6 |
| 24 | T3D2536 | −9.6  | −9.8  | −30.5 |
| 25 | T3D2933 | −9.6  | −9.7  | −29.1 |
| 26 | T3D4051 | −9.5  | −9.7  | −28.9 |
| 27 | T3D2527 | −9.5  | −9.7  | −27.8 |
| 28 | T3D0233 | −9.5  | −9.7  | −24.1 |
| 29 | T3D2910 | −9.5  | −9.6  | −23.7 |
| 30 | T3D2863 | −9.5  | −9.6  | −22.3 |
| 31 | T3D2535 | −9.4  | −9.6  | −21.2 |
| 32 | T3D4232 | −9.3  | −9.6  | −21.0 |

<sup>a</sup>Data sorted according to MM-GBSA binding energy over 5 ns MD Simulations.

<sup>b</sup>Conv. stands for the conventional docking calculation.

<sup>c</sup>exp. stands for the expensive docking calculation.

**Table S3.** Top 20 enriched pathways influenced by philanthotoxin (T3D2489) targets resulted from PEA analysis.

| Pathway name                                                                        | Entities  |       |          |          | Reactions |       |
|-------------------------------------------------------------------------------------|-----------|-------|----------|----------|-----------|-------|
|                                                                                     | found     | ratio | pValue   | FDR      | found     | ratio |
| Interleukin-4 and Interleukin-13 signaling                                          | 17 / 351  | 0.016 | 8.88E-16 | 8.46E-13 | 24 / 47   | 0.003 |
| Activation of Matrix Metalloproteinases                                             | 9 / 74    | 0.003 | 5.73E-13 | 2.73E-10 | 22 / 27   | 0.002 |
| Collagen degradation                                                                | 9 / 79    | 0.004 | 1.02E-12 | 3.24E-10 | 17 / 34   | 0.003 |
| Degradation of the extracellular matrix                                             | 11 / 224  | 0.01  | 2.07E-11 | 4.94E-09 | 60 / 105  | 0.008 |
| Assembly of collagen fibrils and other multi-meric structures                       | 6 / 79    | 0.004 | 8.03E-08 | 1.53E-05 | 1 / 26    | 0.002 |
| Interleukin-10 signaling                                                            | 9 / 175   | 0.008 | 7.79E-06 | 1.23E-03 | 7 / 15    | 0.001 |
| Collagen formation                                                                  | 6 / 207   | 0.01  | 2.00E-05 | 2.72E-03 | 1 / 77    | 0.006 |
| Trafficking and processing of endosomal TLR                                         | 5 / 61    | 0.003 | 2.35E-05 | 2.80E-03 | 3 / 7     | 0.001 |
| Extracellular matrix organization                                                   | 13 / 1014 | 0.047 | 6.88E-05 | 7.22E-03 | 66 / 319  | 0.024 |
| CLEC7A/inflammasome pathway                                                         | 3 / 30    | 0.001 | 7.71E-05 | 7.32E-03 | 2 / 4     | 0     |
| RUNX1 regulates transcription of genes involved in differentiation of keratinocytes | 3 / 43    | 0.002 | 2.21E-04 | 1.68E-02 | 2 / 8     | 0.001 |
| Signaling by Interleukins                                                           | 26 / 2524 | 0.116 | 2.30E-04 | 1.68E-02 | 147 / 493 | 0.036 |

|                                                                   |           |       |          |          |            |       |
|-------------------------------------------------------------------|-----------|-------|----------|----------|------------|-------|
| Extra-nuclear estrogen signaling                                  | 11 / 462  | 0.021 | 2.31E-04 | 1.68E-02 | 17 / 38    | 0.003 |
| p75NTR negatively regulates cell cycle via SC1                    | 2 / 9     | 0     | 2.80E-04 | 1.91E-02 | 1 / 3      | 0     |
| CTLA4 inhibitory signaling                                        | 3 / 61    | 0.003 | 6.11E-04 | 3.85E-02 | 3 / 5      | 0     |
| Negative regulation of the PI3K/AKT network                       | 6 / 324   | 0.015 | 1.76E-03 | 1.04E-01 | 8 / 10     | 0.001 |
| Interleukin-1 processing                                          | 2 / 25    | 0.001 | 2.10E-03 | 1.18E-01 | 2 / 5      | 0     |
| MHC class II antigen presentation                                 | 5 / 235   | 0.011 | 3.67E-03 | 1.91E-01 | 4 / 26     | 0.002 |
| Thrombin signalling through proteinase activated receptors (PARs) | 5 / 121   | 0.006 | 4.26E-03 | 2.10E-01 | 9 / 15     | 0.001 |
| Immune System                                                     | 40 / 6071 | 0.28  | 4.51E-03 | 2.10E-01 | 272 / 1623 | 0.12  |
